# Supplementary material for: Modulation of the spin transition in 2D Hofmann frameworks via π⋯π stacking between the axial 2,5-dipyridyl-1,3,4-oxadiazoles
Source: Royal Society of Chemistry journal article supplement (doi:10.1039/d3nj01390a), 2023-01-01
Supplement: d3nj01390a1.pdf [file d3nj01390a1.pdf]

Electronic Supplementary Information (ESI) for

**Modulation of spin transition in 2D Hofmann frameworks via  $\pi \cdots \pi$  stacking between the axial 2,5-dipyridyl-1,3,4-oxadiazoles**

Zhe Feng,<sup>a</sup> Jie-Jie Ling,<sup>a</sup> Huijie Song<sup>a</sup> and Dunru Zhu<sup>\*a,b</sup>

<sup>a</sup> College of Chemical Engineering, State Key Laboratory of Materials-oriented Chemical Engineering, Nanjing Tech University, 30 Puzhu South Road, Nanjing 211816, P.R. China.

<sup>b</sup> State Key Laboratory of Coordination Chemistry, Nanjing University, 163 Xianlin Avenue, Nanjing 210023, P.R. China

\* Correspondence e-mail: zhudr@njtech.edu.cn

## Contents

|                                                              |    |
|--------------------------------------------------------------|----|
| 1. The FT-IR spectra of <b>1-3</b> .....                     | S2 |
| 2. The thermogravimetric analysis curves of <b>1-3</b> ..... | S3 |
| 3. The PXRD patterns of <b>1-3</b> .....                     | S5 |
| 4. Molecular structures of <b>1-3</b> .....                  | S6 |
| 5. Selected bond distances and angles for <b>1-3</b> .....   | S8 |
| 6. Dihedral angles for complexes <b>1-3</b> .....            | S9 |
| 7. Comparison of the magneto-structural correlation.....     | S9 |

### 1. The FT-IR spectra of 1-3

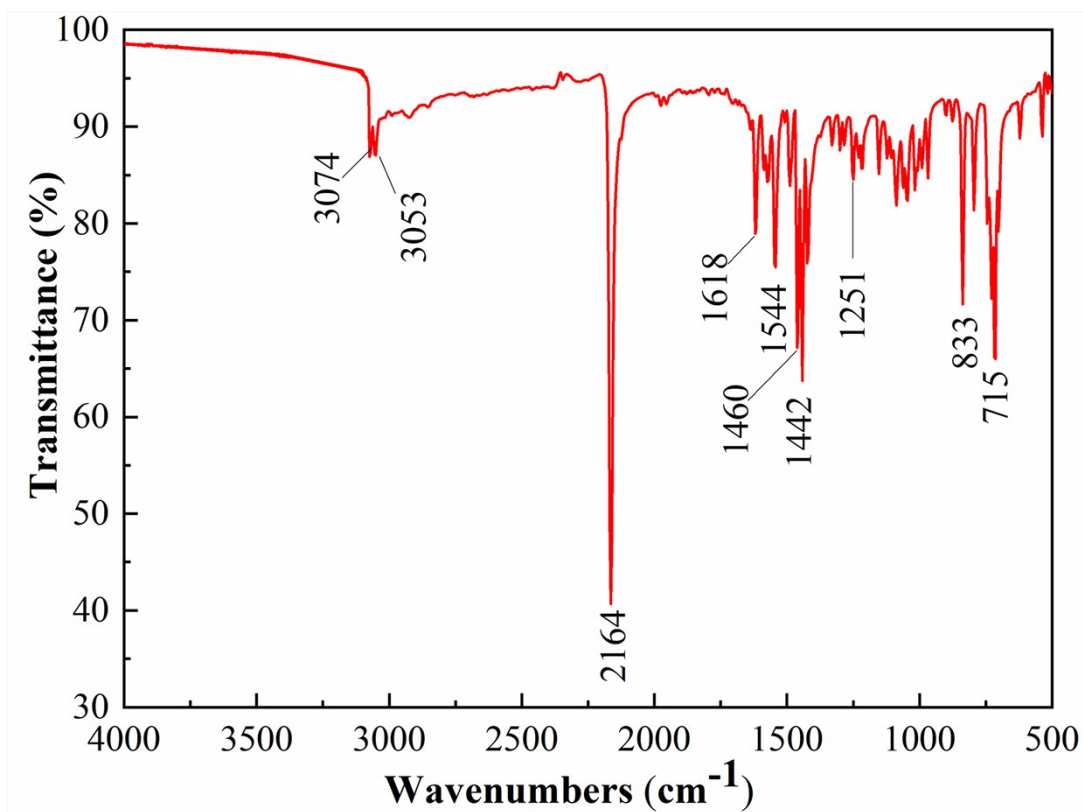

Fig. S1 The IR spectrum of 1.

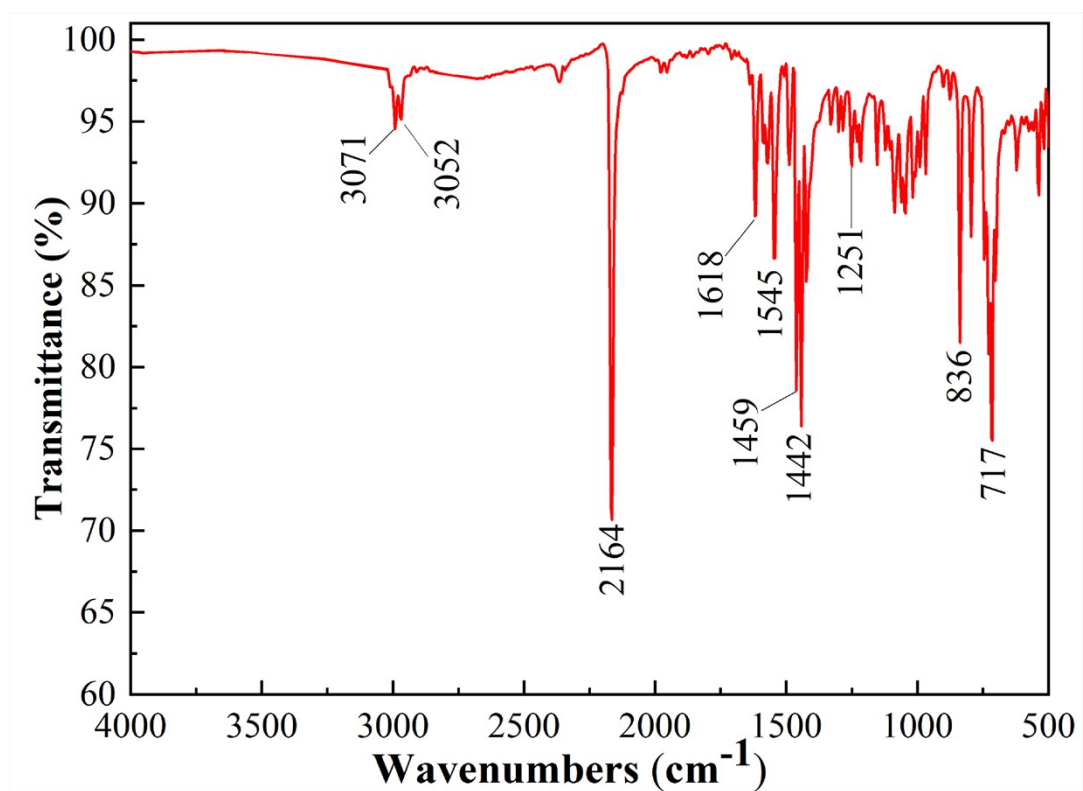

Fig. S2 The IR spectrum of 2.

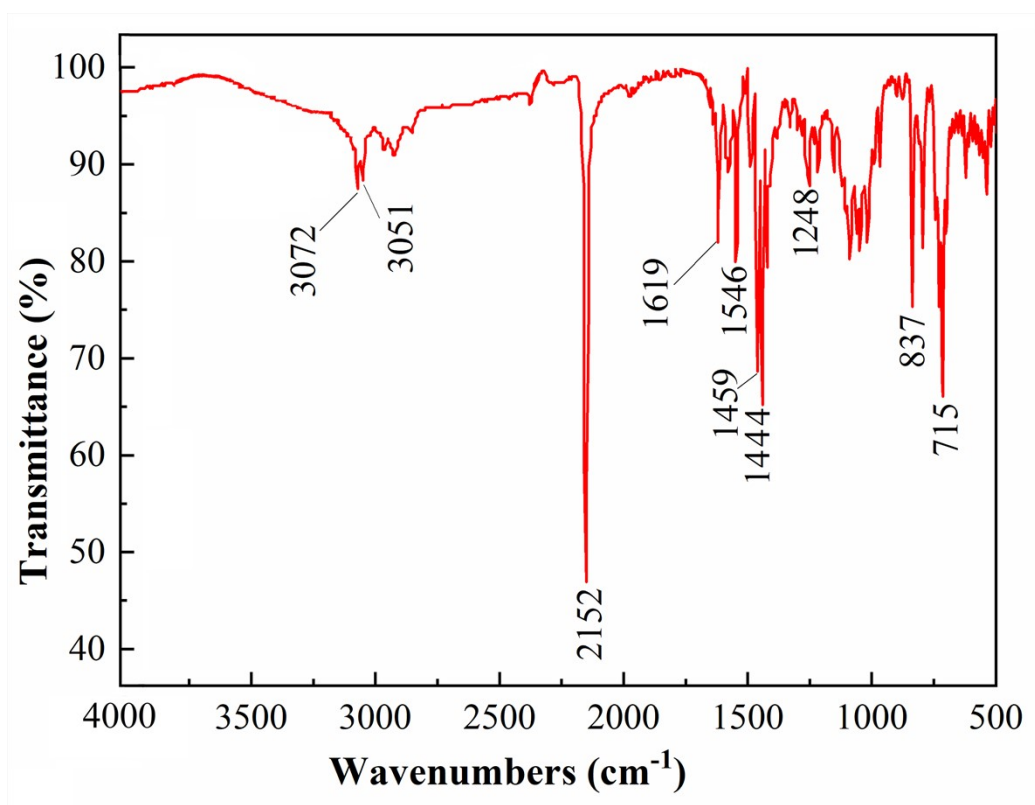

Fig. S3 The IR spectrum of 3.

## 2. The thermogravimetric analysis curves of 1-3

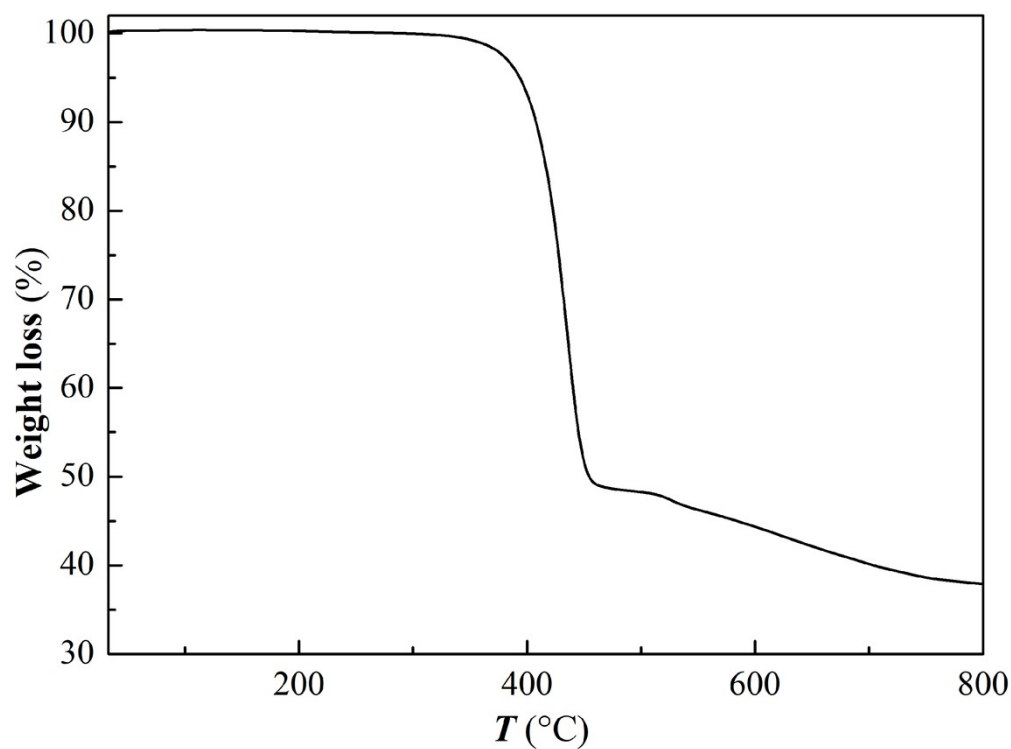

Fig. S4 Thermogravimetric analysis curve of 1.

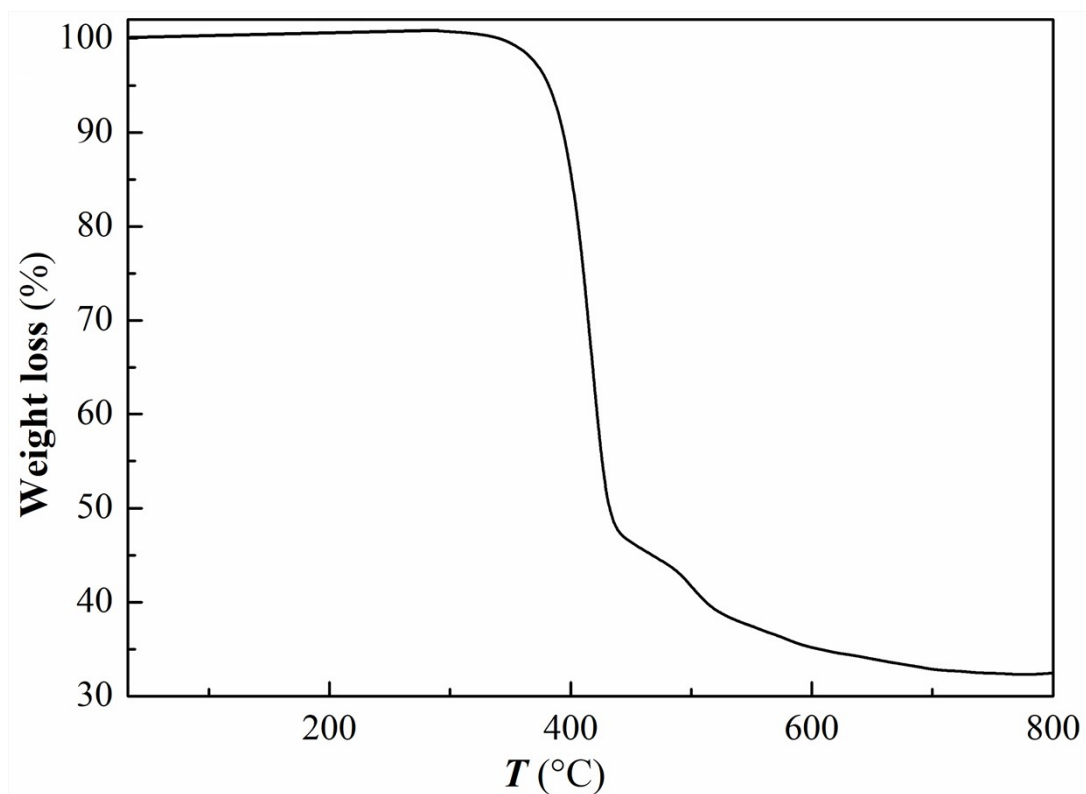

**Fig. S5** Thermogravimetric analysis curve of **2**.

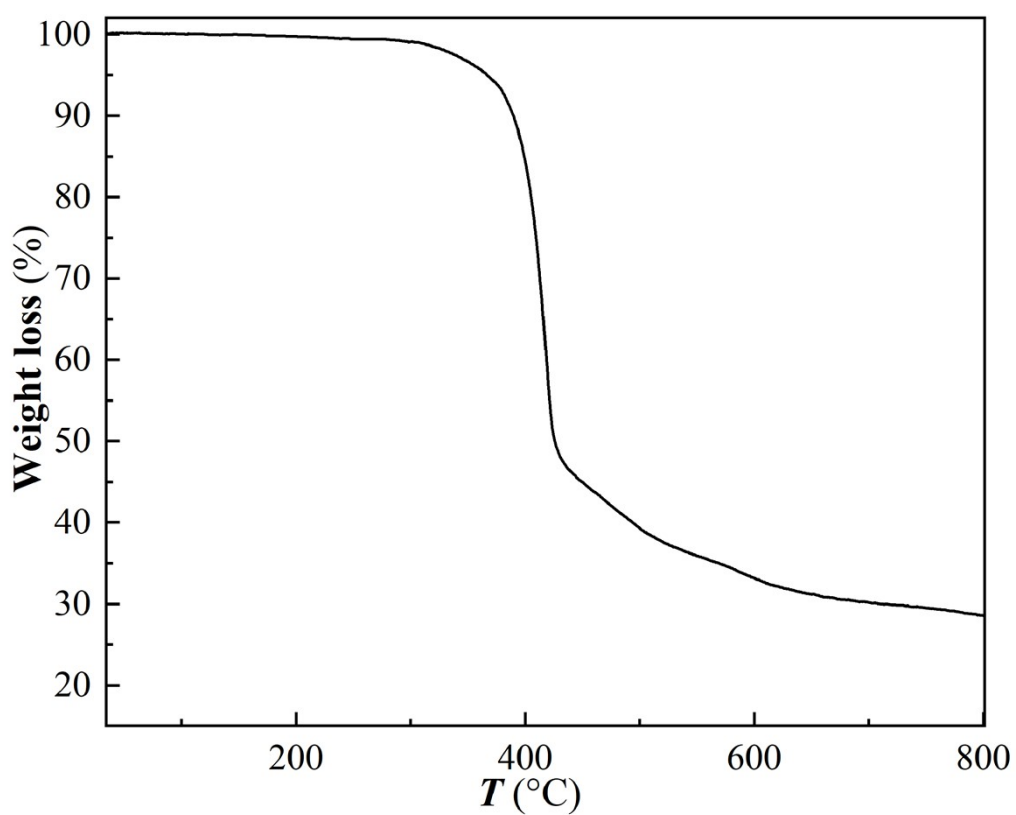

**Fig. S6** Thermogravimetric analysis curve of **3**.

### 3. The PXRD patterns of 1-3

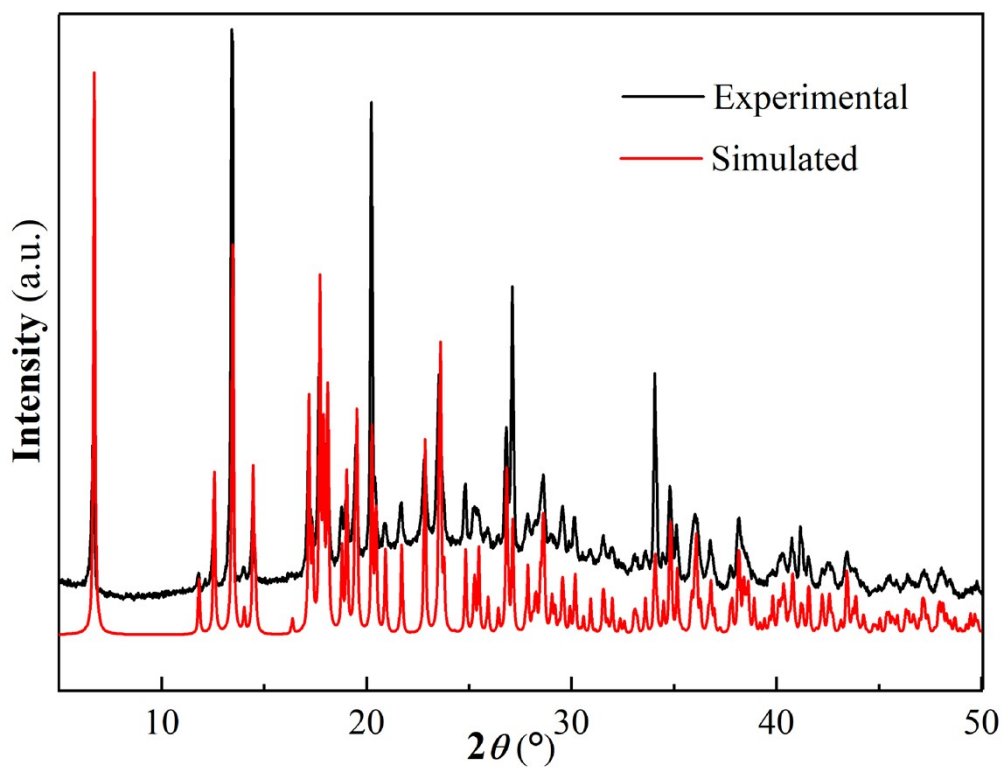

Fig. S7 The PXRD patterns of 1.

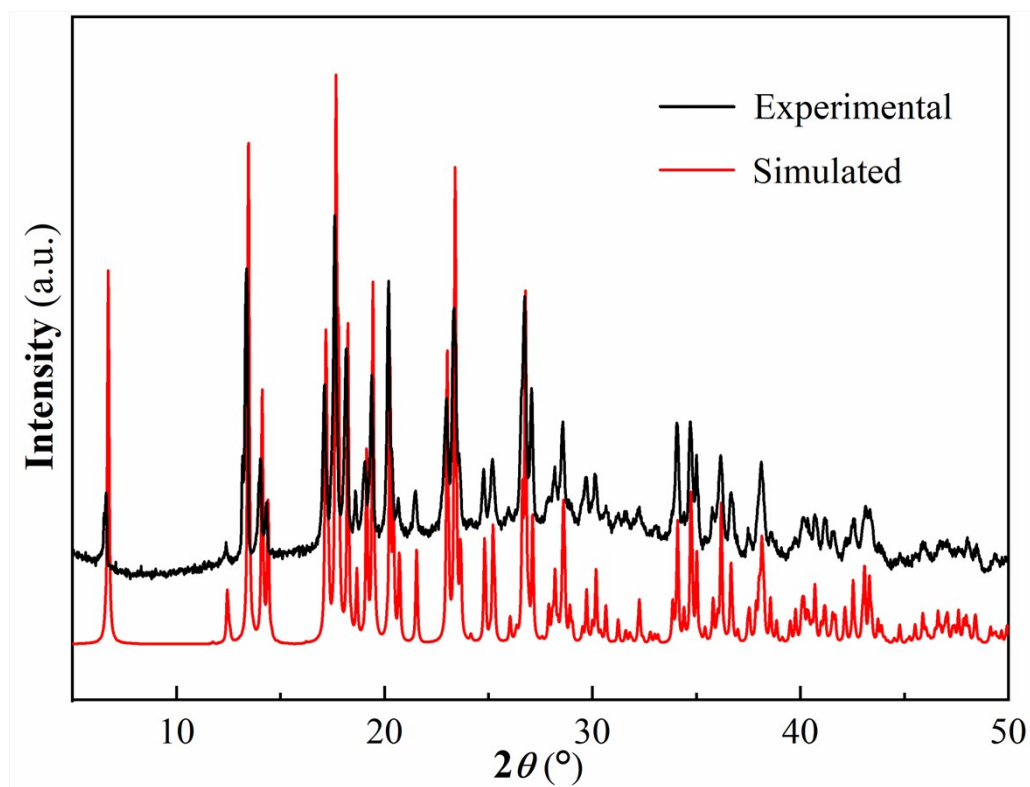

Fig. S8 The PXRD patterns of 2.

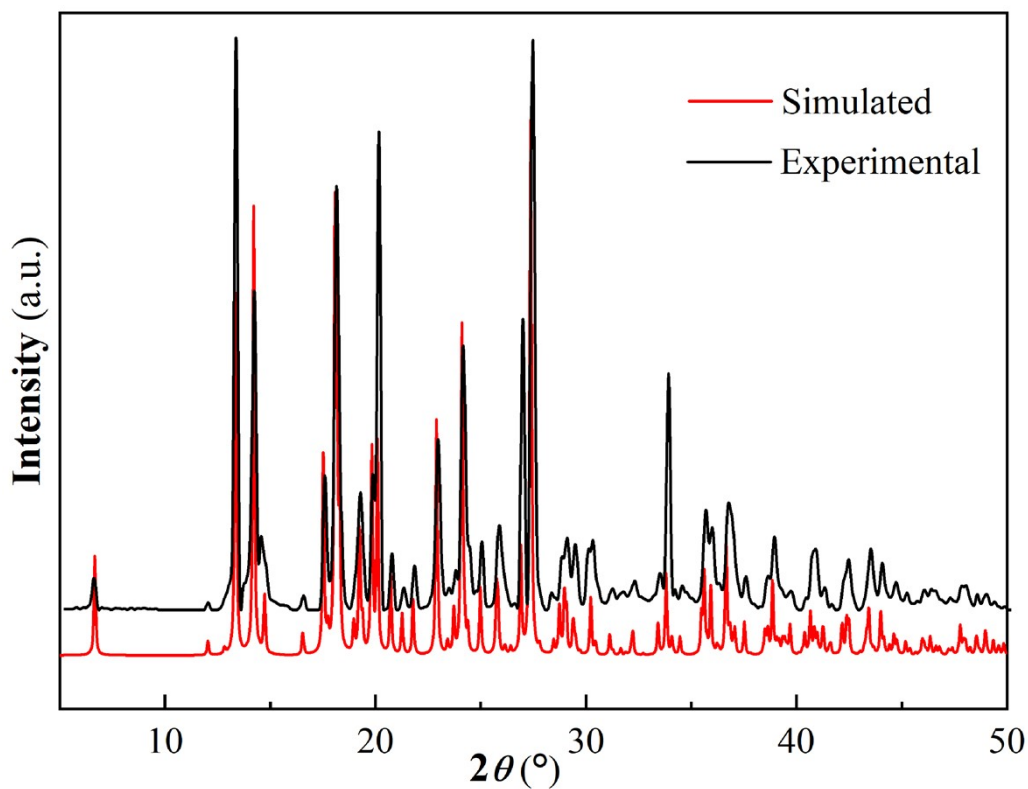

Fig. S9 The PXRD patterns of **3**.

#### 4. Molecular Structures of 1-3

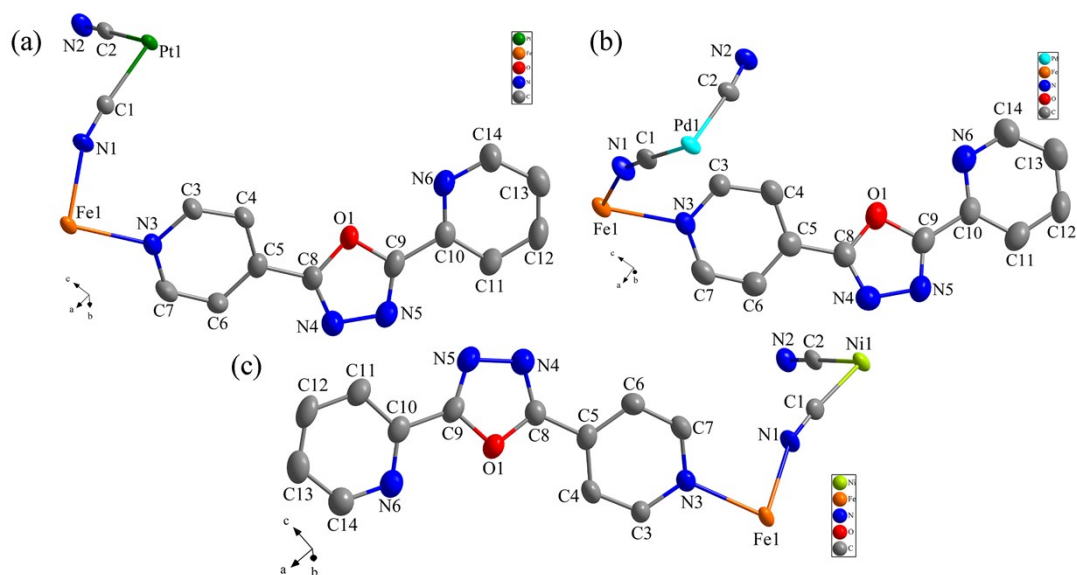

Fig. S10 The asymmetric unit of **1** (a), **2** (b) and **3** (c) with 50% thermal ellipsoids probability, all hydrogen atoms are omitted for clarity.

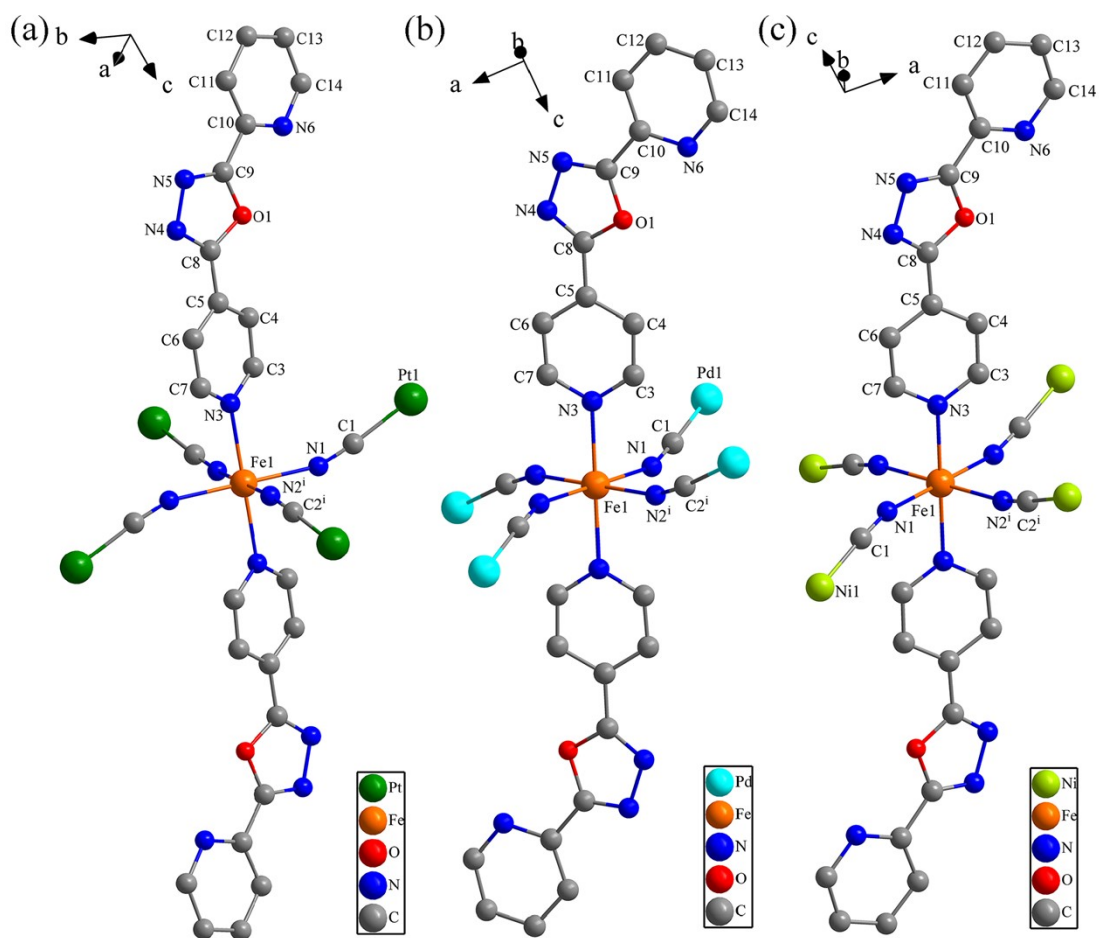

**Fig. S11** The coordinated environments of  $\text{Fe}^{2+}$  ion in **1** (a), **2** (b) and **3** (c), all hydrogen atoms are omitted for clarity.

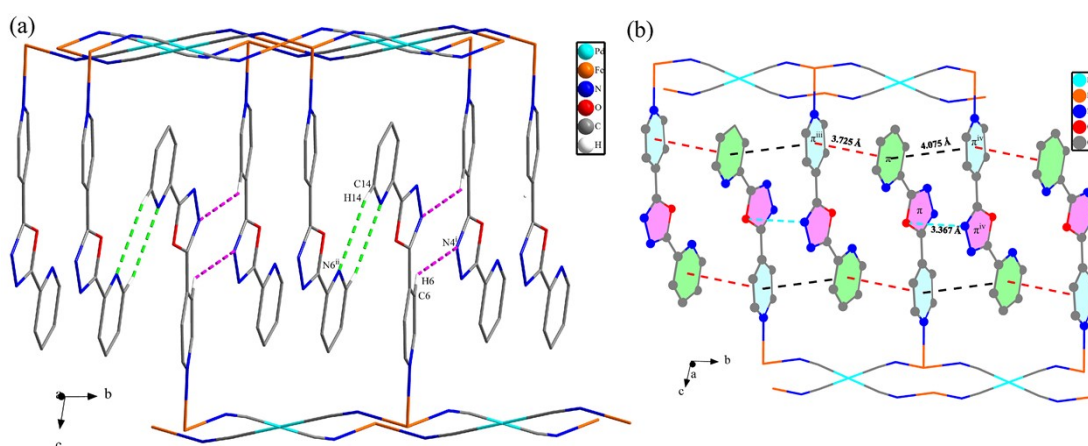

**Fig. S12** (a) Two kinds of intermolecular hydrogen bonds in **2**; (b) Three kinds of offset face-to-face  $\pi \cdots \pi$  interactions in **2**.

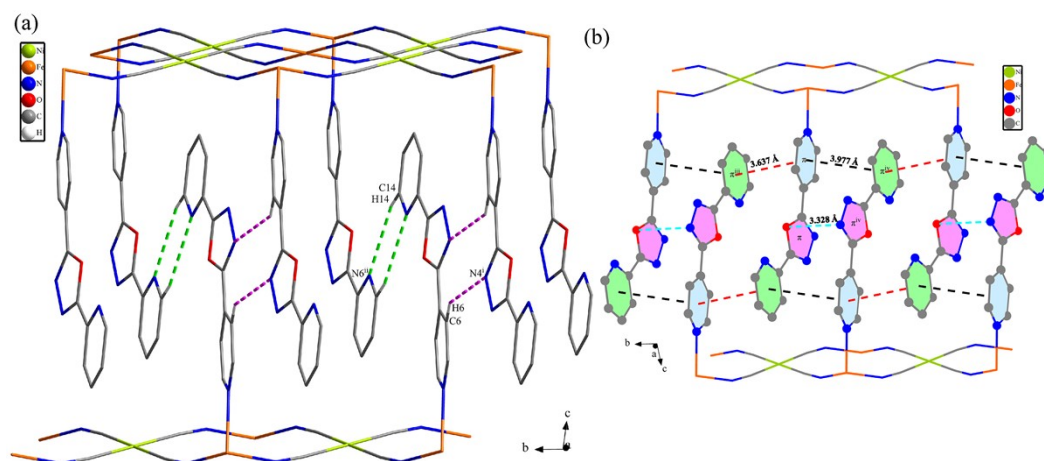

**Fig. S13** (a) Two kinds of intermolecular hydrogen bonds in **3**; (b) Three kinds of offset face-to-face  $\pi \cdots \pi$  interactions in **3**.

## 5. Selected bond distances and angles for 1-3

**Table S1** Selected bond distances (Å) and angles (°) for **1-3**

|                                        | <b>1</b>  |                                        | <b>2</b>   |                                        | <b>3</b>  |  |
|----------------------------------------|-----------|----------------------------------------|------------|----------------------------------------|-----------|--|
| Fe1-N1                                 | 2.140(4)  | Fe1-N1                                 | 2.171(5)   | Fe1-N1                                 | 2.148(3)  |  |
| Fe1-N2 <sup>i</sup>                    | 2.157(4)  | Fe1-N2 <sup>i</sup>                    | 2.157(5)   | Fe1-N2 <sup>i</sup>                    | 2.165(3)  |  |
| Fe1-N3                                 | 2.214(4)  | Fe1-N3                                 | 2.226(5)   | Fe1-N3                                 | 2.212(3)  |  |
| Pt1-C1                                 | 1.986(5)  | Pd1-C1                                 | 1.995(6)   | Ni1-C1                                 | 1.861(3)  |  |
| Pt1-C2                                 | 1.986(5)  | Pd1-C2                                 | 1.999(6)   | Ni1-C2                                 | 1.869(3)  |  |
| C1-N1                                  | 1.144(6)  | C1-N1                                  | 1.140(8)   | C1-N1                                  | 1.144(4)  |  |
| N2-C2                                  | 1.142(6)  | N2-C2                                  | 1.139(8)   | N2-C2                                  | 1.134(4)  |  |
| Fe $\cdots$ Fe <sup>iv</sup>           | 10.334(2) | Fe $\cdots$ Fe <sup>iv</sup>           | 10.400(3)  | Fe $\cdots$ Fe <sup>iv</sup>           | 10.116(2) |  |
| N1-Fe1-N2 <sup>i</sup>                 | 88.88(16) | N1-Fe1-N2 <sup>i</sup>                 | 91.47(2)   | N1-Fe1-N2 <sup>i</sup>                 | 88.58(10) |  |
| N1-Fe1-N2 <sup>ii</sup>                | 91.12(16) | N1-Fe1-N2 <sup>ii</sup>                | 88.53(2)   | N1-Fe1-N2 <sup>ii</sup>                | 91.42(10) |  |
| N2 <sup>i</sup> -Fe1-N3                | 91.83(15) | N2 <sup>i</sup> -Fe1-N3                | 89.71(4)   | N2 <sup>i</sup> -Fe1-N3                | 87.67(10) |  |
| N2 <sup>i</sup> -Fe1-N3 <sup>iii</sup> | 88.17(15) | N2 <sup>i</sup> -Fe1-N3 <sup>iii</sup> | 90.30(6)   | N2 <sup>i</sup> -Fe1-N3 <sup>iii</sup> | 92.33(10) |  |
| N1-Fe1-N3                              | 89.83(15) | N1-Fe1-N3                              | 88.31(5)   | N1-Fe1-N3                              | 90.46(10) |  |
| N1-Fe1-N3 <sup>iii</sup>               | 90.17(15) | N1-Fe1-N3 <sup>iii</sup>               | 91.70(5)   | N1-Fe1-N3 <sup>iii</sup>               | 89.54(10) |  |
| C1-N1-Fe1                              | 160.17(1) | C1-N1-Fe1                              | 158.93(4)  | C1-N1-Fe1                              | 161.23(3) |  |
| C2 <sup>i</sup> -N2 <sup>i</sup> -Fe1  | 159.52(1) | C2 <sup>i</sup> -N2 <sup>i</sup> -Fe1  | 160.56(8)  | C2 <sup>i</sup> -N2 <sup>i</sup> -Fe1  | 161.32(3) |  |
| C7-N3-Fe1                              | 122.17(6) | C7-N3-Fe1                              | 121.30(11) | C7-N3-Fe1                              | 121.50(2) |  |
| C3-N3-Fe1                              | 121.61(9) | C3-N3-Fe1                              | 121.57(4)  | C3-N3-Fe1                              | 121.29(2) |  |
| N1-C1-Pt1                              | 175.30(1) | N1-C1-Pd1                              | 176.65(3)  | N1-C1-Ni1                              | 174.75(3) |  |
| N2-C2-Pt1                              | 176.97(5) | N2-C2-Pd1                              | 174.20(8)  | N2-C2-Ni1                              | 176.08(3) |  |

Symmetry codes: **1**: i) 2-x, 1-y, 2-z; ii) x, 1+y, z; iii) 2-x, 2-y, 2-z; iv) x-1, y-1, z; **2**: i) 1-x, 1-y, 2-z; ii) 1+x, y, z; iii) 2-x, 1-y, 2-z; iv) x-1, 1+y, z; **3**: i) -x, -y, -z; ii) x, 1+y, z; iii) -x, 1-y, -z; iv) x-1, y-1, z.



**Table S2** Dihedral angles (°) for complexes **1-3**

| Complex  | 4-Py/Ox | 2-Py/Ox | [FeN <sub>4</sub> ]/[M(CN) <sub>4</sub> ] <sup>2-</sup> |
|----------|---------|---------|---------------------------------------------------------|
| <b>1</b> | 14.7(4) | 6.5(2)  | 33.0(3)                                                 |
| <b>2</b> | 15.3(5) | 5.6(2)  | 34.7(2)                                                 |
| <b>3</b> | 15.1(2) | 7.3(3)  | 32.2(2)                                                 |

**Table S3** Critical temperature ( $T_{1/2}$ ), hysteresis width ( $\Delta T$ ), interlayer distance ( $D_L$ ), cent···cent ( $D_C$ ) and plane···plane ( $D_P$ ) distances of  $\pi$ ··· $\pi$  interactions and dihedral angles of three 2D Hofmann SCO frameworks

| Complex                                          | Size of ligand (Å) | $T_{1/2}$ (K) | $\Delta T$ (K) | $D_L$ (Å) | $D_C$ (Å)             | 4-Py/<br>2-Py (°) | $D_P$ (Å) | [FeN <sub>4</sub> ]/<br>[Pt(CN) <sub>4</sub> ] <sup>2-</sup> (°) |
|--------------------------------------------------|--------------------|---------------|----------------|-----------|-----------------------|-------------------|-----------|------------------------------------------------------------------|
| [Fe(2,4-Bipy) <sub>2</sub> Pt(CN) <sub>4</sub> ] | 7.958(2)           | 206/247       | 41             | 11.576(2) | 4.055(4)              | 0                 | 3.780(2)  | 44.3(2)                                                          |
| [Fe(ppe) <sub>2</sub> Pt(CN) <sub>4</sub> ]      | 10.293(4)          | 132/136       | 4              | –         | –                     | –                 | –         | –                                                                |
| [Fe(ppo) <sub>2</sub> Pt(CN) <sub>4</sub> ]      | 11.463(4)          | 94            | 0              | 13.137(4) | 3.703(3)/<br>4.046(4) | 8.96              | –         | 33.0(3)                                                          |
